# Supplementary material for: Coumarin based dual switching fluorescent ‘turn-on’ chemosensor for selective detection of Zn2+ and HSO4−: an experimental and theoretical study
Source: Royal Society of Chemistry journal article supplement (doi:10.1039/c4ra02765e), 2014-01-01
Supplement: c4ra02765e1.pdf [file c4ra02765e1.pdf]

## Supporting Information

# Coumarin based dual switching fluorescent ‘turn-on’ chemosensor for selective detection of $Zn^{2+}$ and $HSO_4^-$ : An experimental and theoretical study

Deblina Sarkar<sup>a</sup>, Ajoy Kumar Pramanik<sup>a</sup> and Tapan Kumar Mondal<sup>a\*</sup>

*a Department of Chemistry, Jadavpur University, Kolkata-700032, India*

*E-mail: [tkmondal@chemistry.jdvu.ac.in](mailto:tkmondal@chemistry.jdvu.ac.in)*

### Contents

**Fig. S1.**  $^1H$ -NMR spectra of HL in  $CDCl_3$

**Fig. S2.**  $^{13}C$ -NMR spectrum of HL in  $CDCl_3$

**Fig. S3.** ESI-MS spectra of the receptor HL

**Fig. S4.** ESI-MS spectra of the receptor HL- $Zn^{2+}$  complex

**Fig. S5.** UV-Vis spectra of chemosensor (HL) (10  $\mu M$ ) upon addition of 2 equivalent of various metal ions (100  $\mu M$ )

**Fig. S6.** Life time decay profile of HL, HL- $Zn^{2+}$  and HL- $HSO_4^-$  ( $\lambda_{excitation} = 370$  nm)

**Fig. S7.** Job’s plot diagram of the receptor (HL) for  $Zn^{2+}$

**Fig. S8.** Determination of Limit Of Detection of the receptor (HL) for  $Zn^{2+}$

**Fig. S9.** Determination of binding constant of the receptor (HL) for  $Zn^{2+}$

**Fig. S10.** Change in emission intensity of chemosensor (HL) upon addition of  $Zn^{2+}$  along with other metal ions

**Fig. S11.** UV-Vis spectra of chemosensor (HL) upon addition of various anions (100  $\mu M$ )

**Fig. S12.** Determination of Limit Of Detection of the receptor (HL) for  $HSO_4^-$

**Fig. S13.** Determination of binding constant of the receptor (HL) for  $HSO_4^-$

**Fig. S14.** Job’s plot diagram of the receptor (HL) for  $HSO_4^-$

**Fig. S15.** Change in emission intensity upon addition of  $HSO_4^-$  along with other anions to the receptor

**Fig. S16.** Contour plots of selected MOs of HL

**Fig. S17.** Contour plots of selected MOs of HL-  $Zn^{2+}$  complex

**Fig. S18.** Contour plots of selected MOs of HL-  $HSO_4^-$  complex

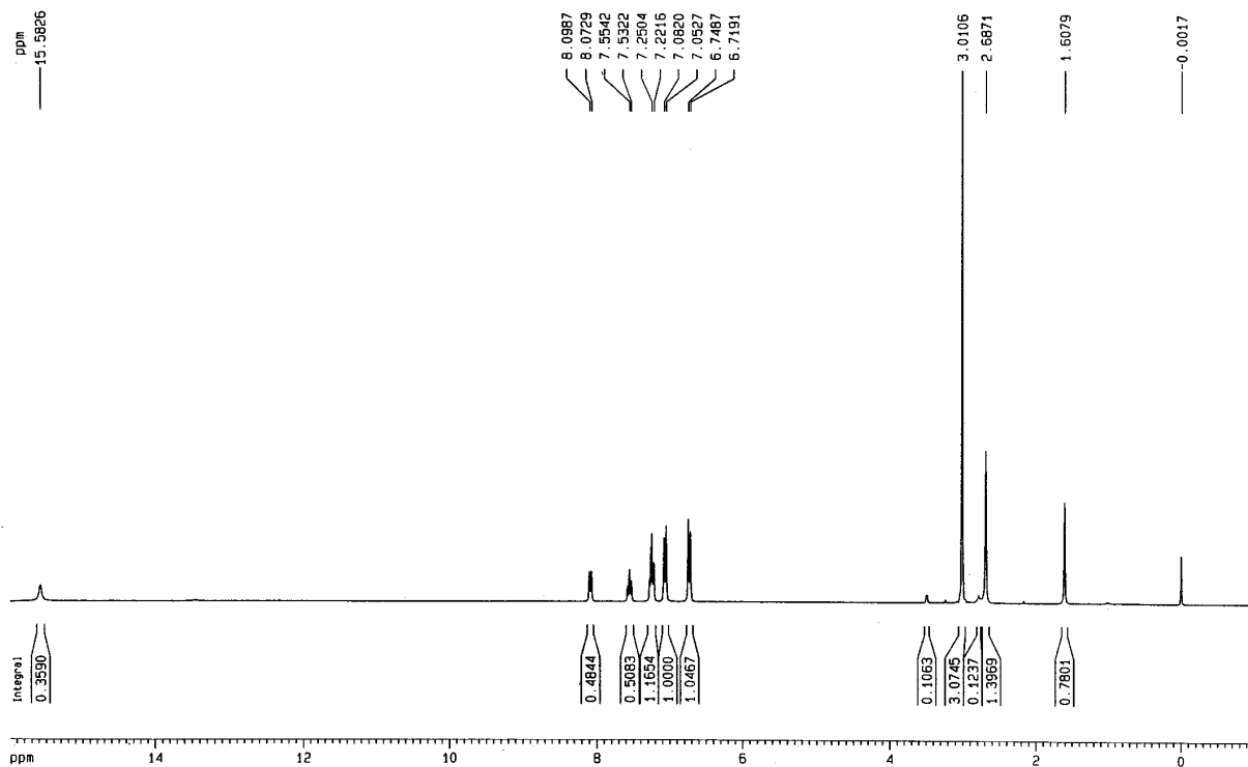

Fig. S1. <sup>1</sup>H-NMR spectra of HL in CDCl<sub>3</sub>

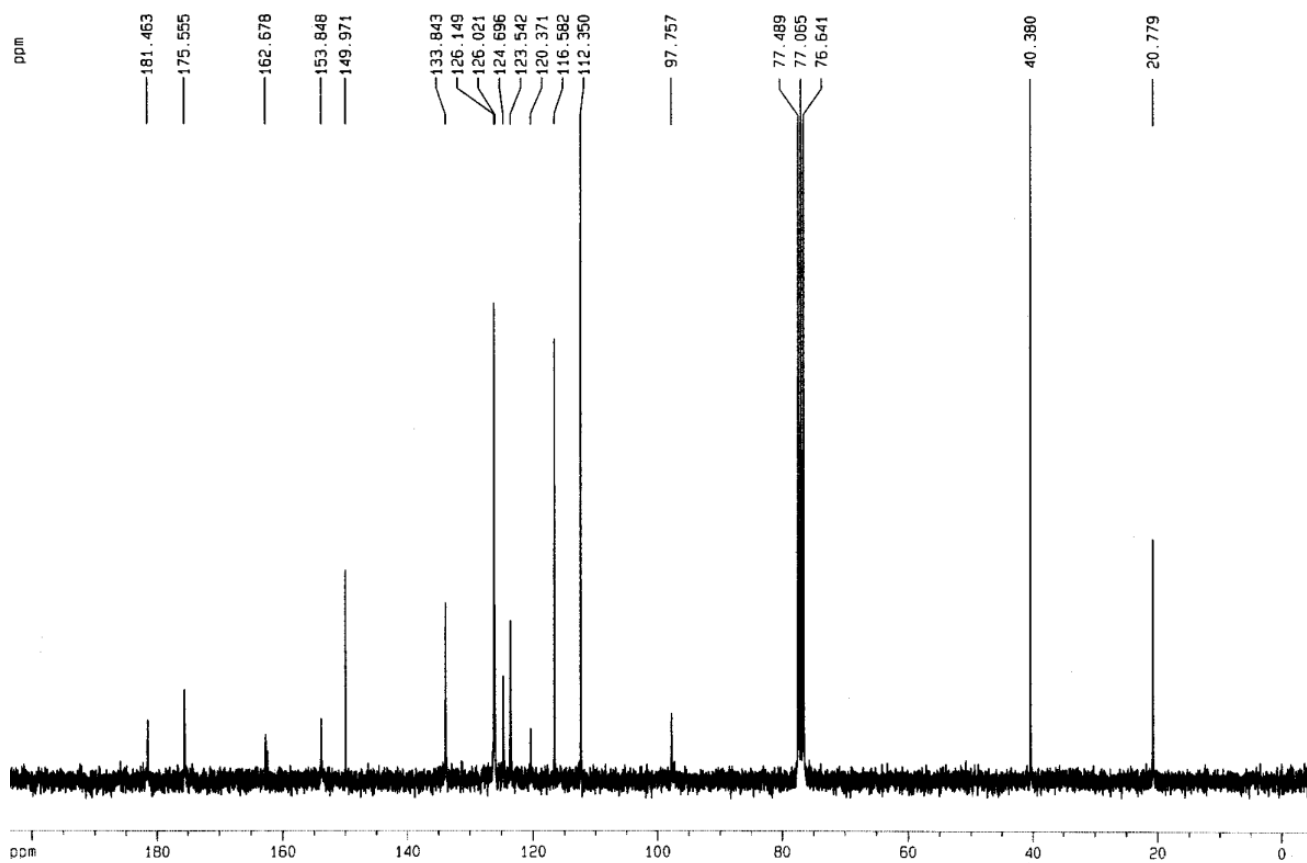

Fig. S2.  $^{13}\text{C}$ -NMR spectrum of HL in  $\text{CDCl}_3$

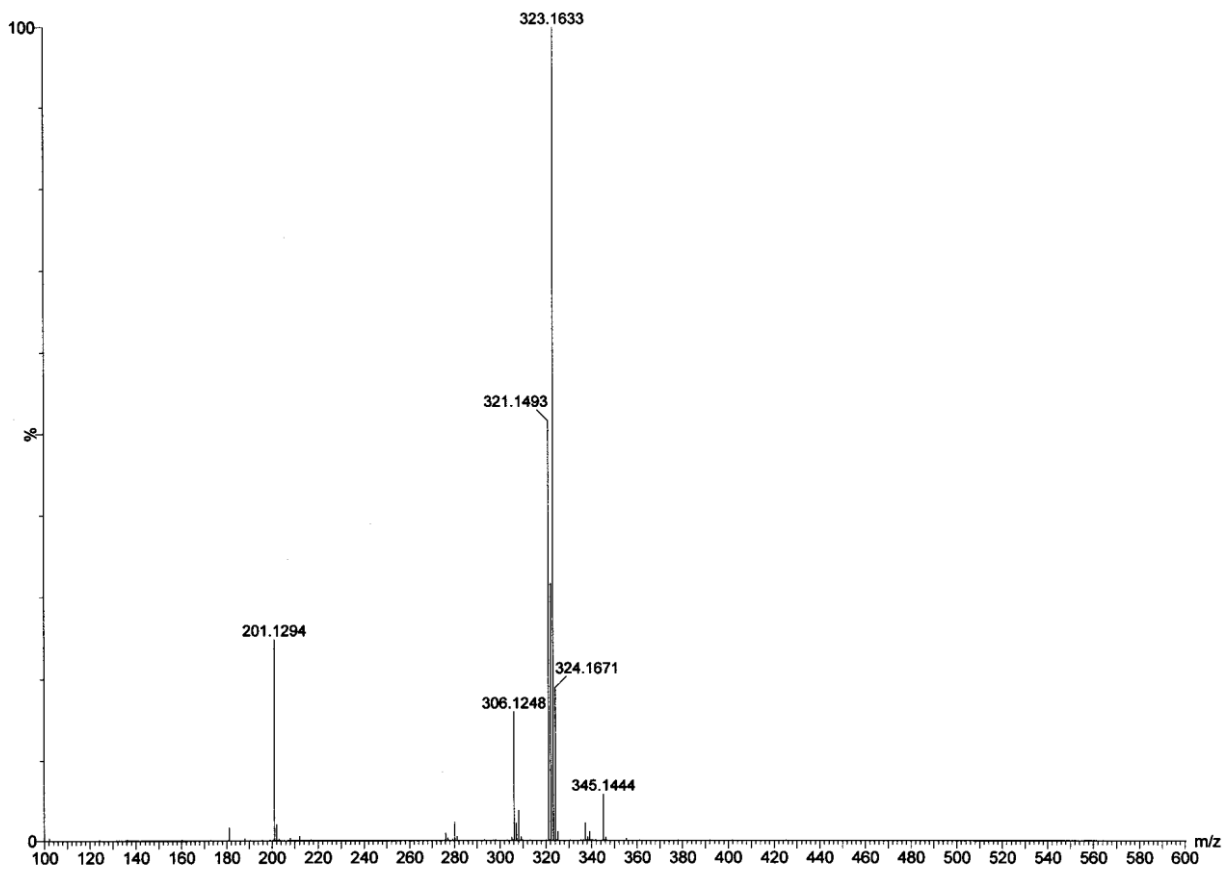

Fig. S3. ESI-MS spectra of the receptor HL

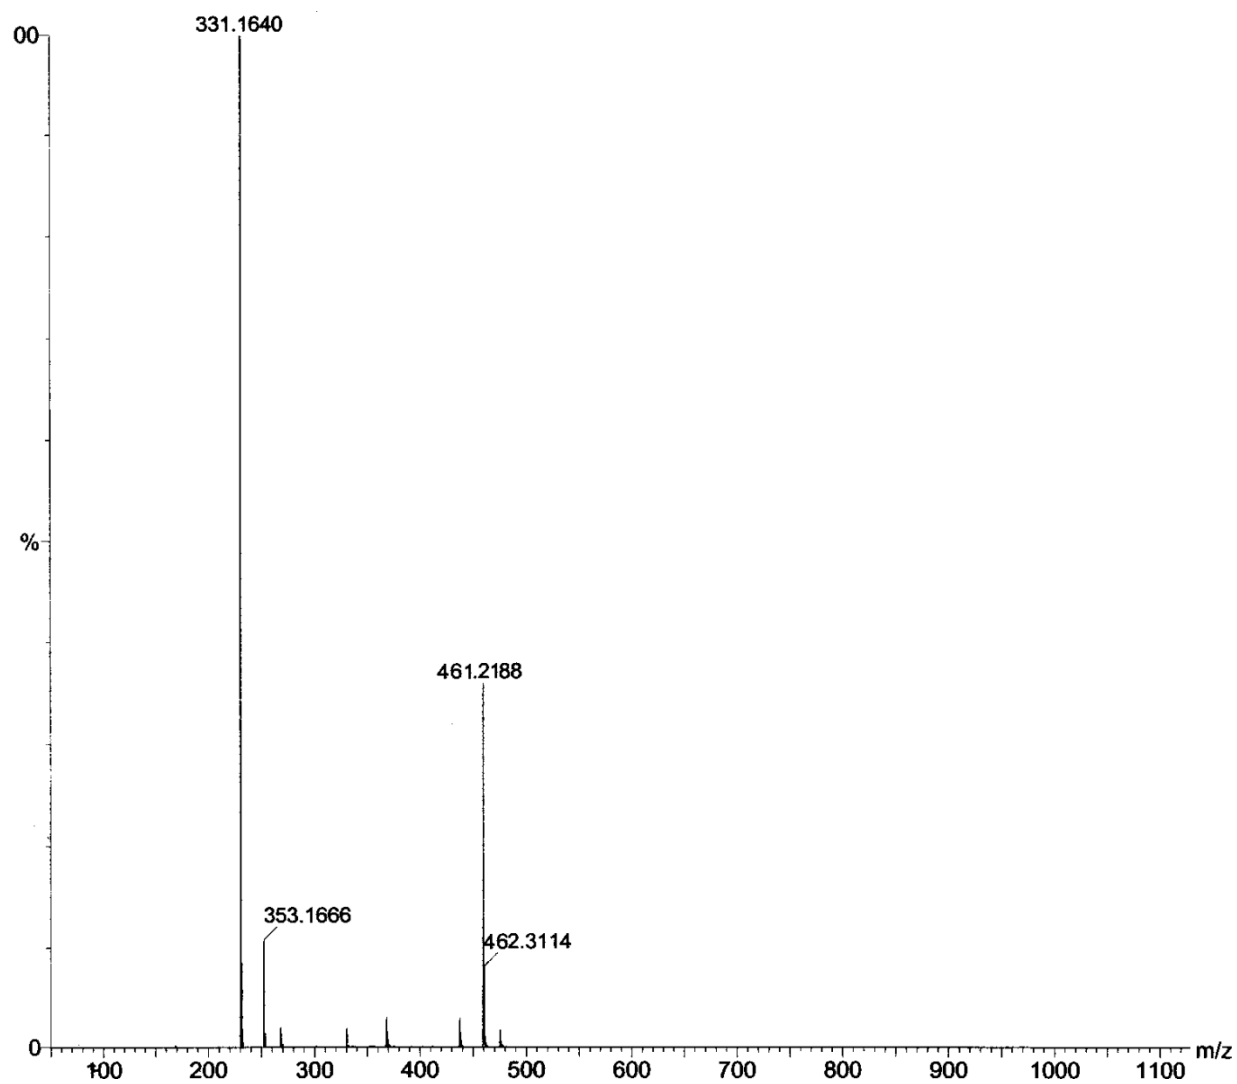

Fig. S4. ESI-MS spectra of the receptor HL-Zn<sup>2+</sup> complex

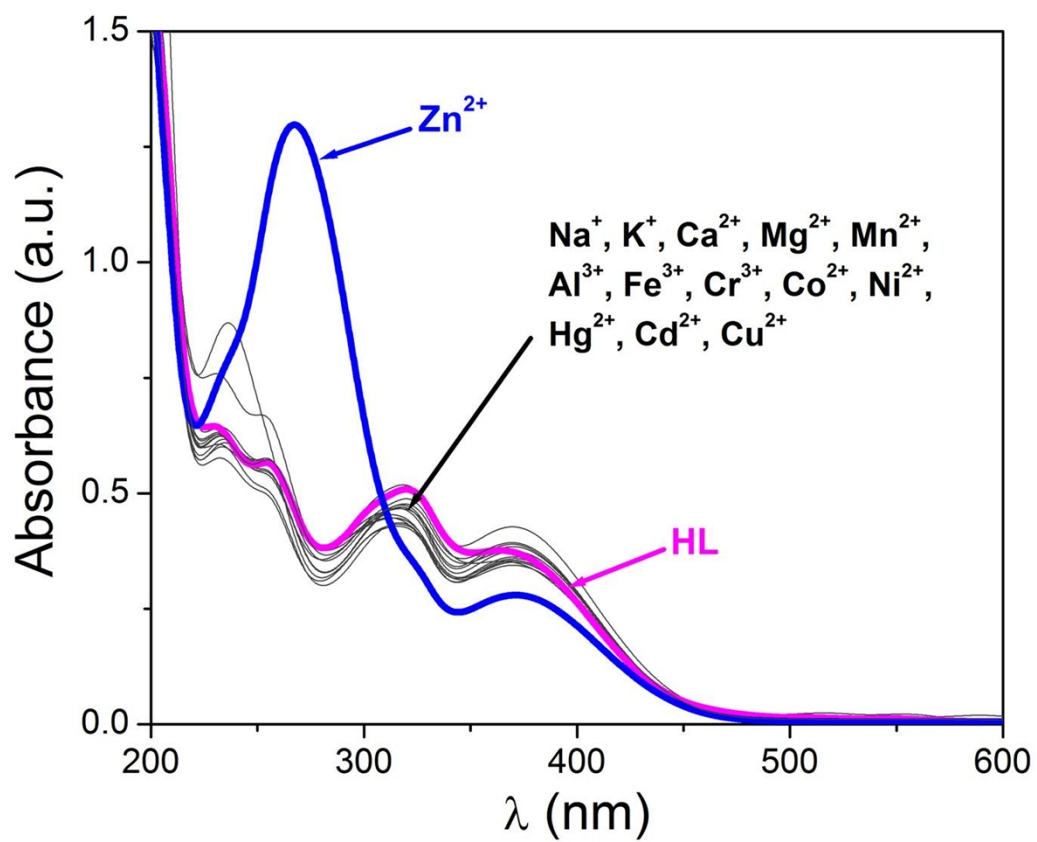

Fig. S5. UV-Vis spectra of chemosensor (HL) (10 μM) upon addition of 2 equivalent of various metal ions (100 μM).

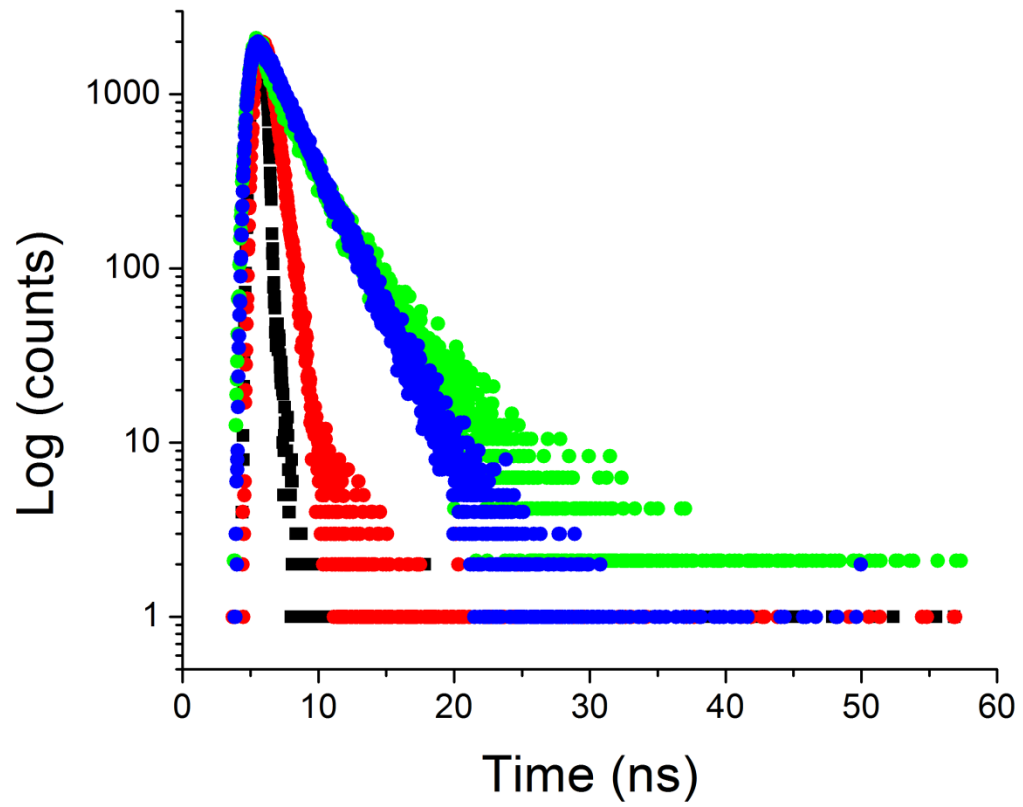

Fig. S6. Life time decay profile of HL (●●●), HL-Zn<sup>2+</sup> (●●●) and HL-HSO<sub>4</sub><sup>-</sup> (●●●) ( $\lambda_{\text{excitation}} = 370$  nm)

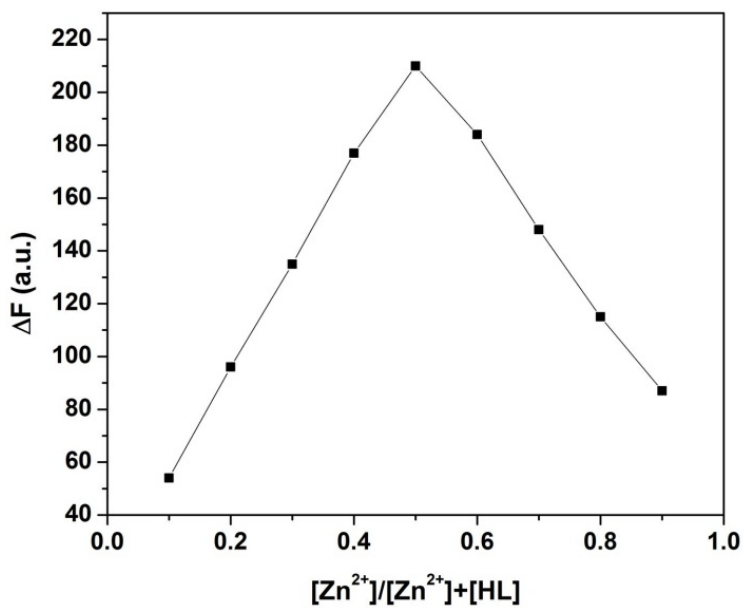



Fig. S7. Job's plot diagram of the receptor (HL) for  $\text{Zn}^{2+}$  (where  $\Delta F$  indicates the change of emission intensity at 457 nm)

**Determination of detection limit:**

The detection limit was calculated based on the fluorescence titration. To determine the S/N ratio, the emission intensity of HL without any analyte was measured by 10 times and the standard deviation of blank measurements was found to be  $5.0859 \times 10^{-4}$ .

The limit of detection (LOD) of HL for  $\text{Zn}^{2+}$  was determined from the following equation:  $\text{LOD} = K \times \sigma$  Where  $K = 3$  in this case and  $\sigma = (\text{Sb}_1)/(\text{S})$ ;  $\text{Sb}_1$  is the standard deviation of the blank solution; S is the slope of the calibration curve.

From the graph we get slope = 23.3248, and  $\text{Sb}_1$  value is  $5.0859 \times 10^{-4}$  (Fig. S8). Thus using the formula we get the  $\text{LOD} = 6.5 \times 10^{-5}$  M.

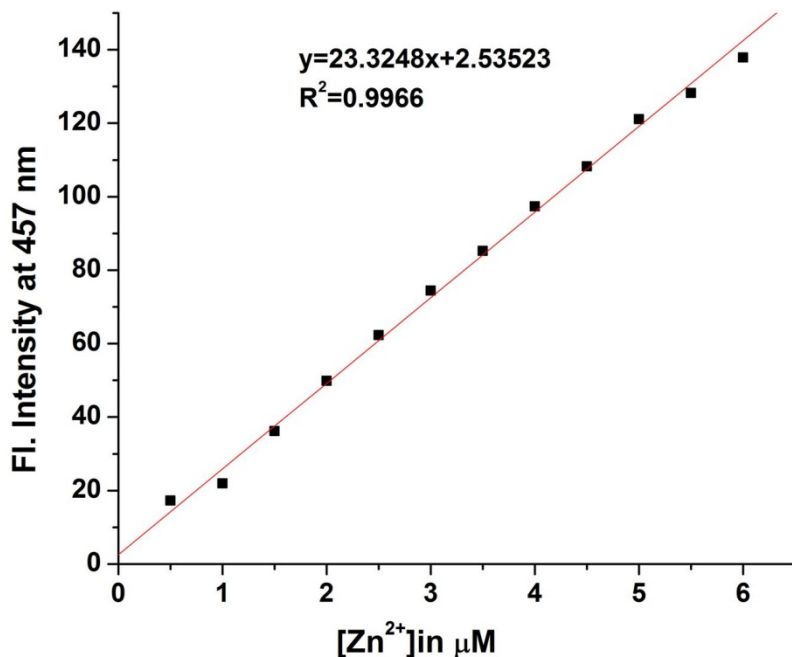

Fig. S8. Linear response curve of HL at 457 nm depending on the Zn<sup>2+</sup> concentration.

#### Determination of binding constant from Fluorescence titration data:

Binding constant was calculated according equation. The binding constant  $\beta$  was calculated following the equation stated below.

$$\text{Log } (F - F_{\min}) / (F_{\max} - F) = n \log [M^{n+}] + B$$

Here  $F_{\min}$ ,  $F$  and  $F_{\max}$  indicate the emission intensity in absence of, at intermediate and at infinite concentration of metal ion respectively.  $B = \log \beta$ , where  $\beta$  is the total binding constant and  $n$  is the number of Zn<sup>2+</sup> bind per ligand. From the plot  $n = 1.103$  indicating 1:1 stoichiometry for the formed HL-Zn<sup>2+</sup> complex (Fig. S8). From the intercept  $\beta$  is found to be  $4.8 \times 10^5$ .

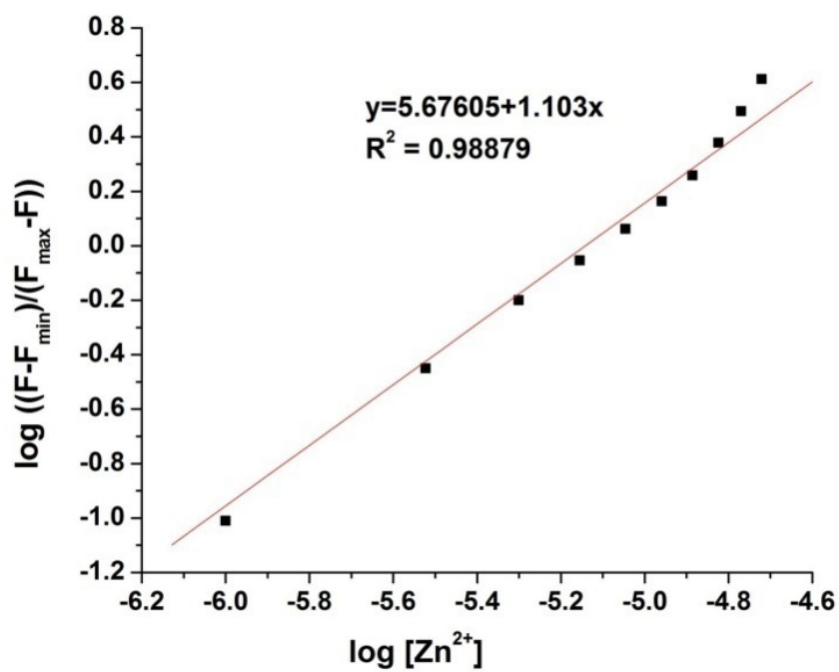

Fig. S9. Determination of binding constant of HL for  $Zn^{2+}$  from fluorescent titration data

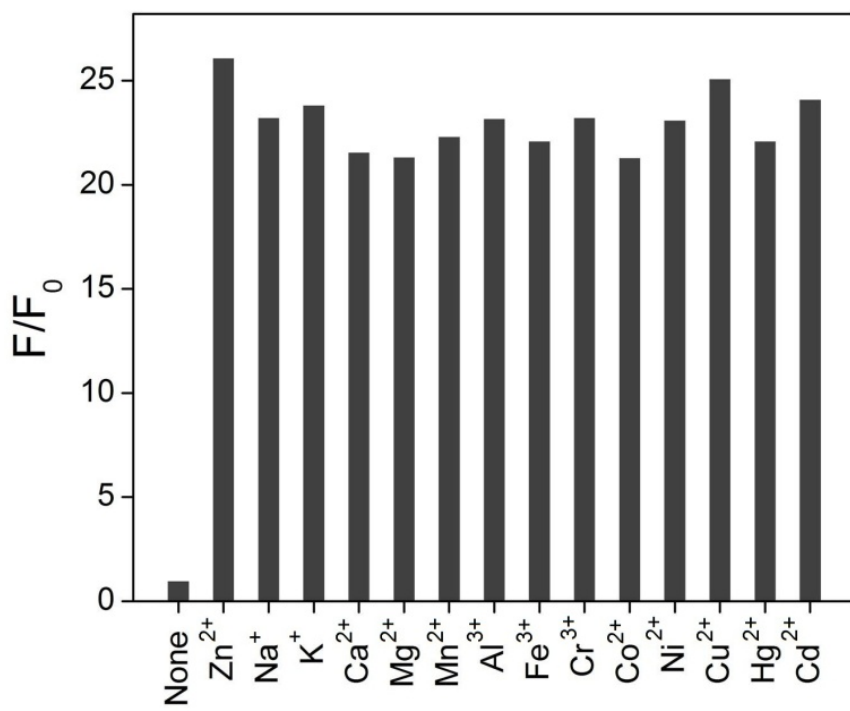

Fig. S10. Change in emission intensity of chemosensor (HL) upon addition of 1 equivalent of  $Zn^{2+}$  along with 2 equivalents of other metal ions to the receptor HL

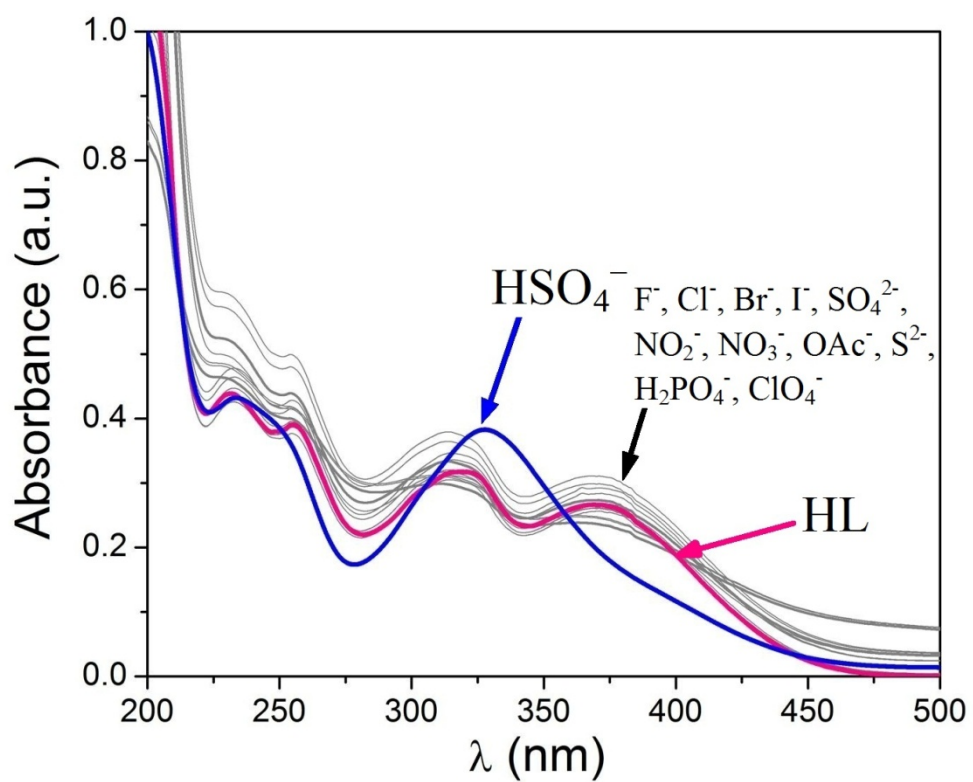

Fig. S11. UV-Vis spectra of chemosensor (HL) (10  $\mu\text{M}$ ) upon addition of 2 equivalent of various anions (100  $\mu\text{M}$ ).

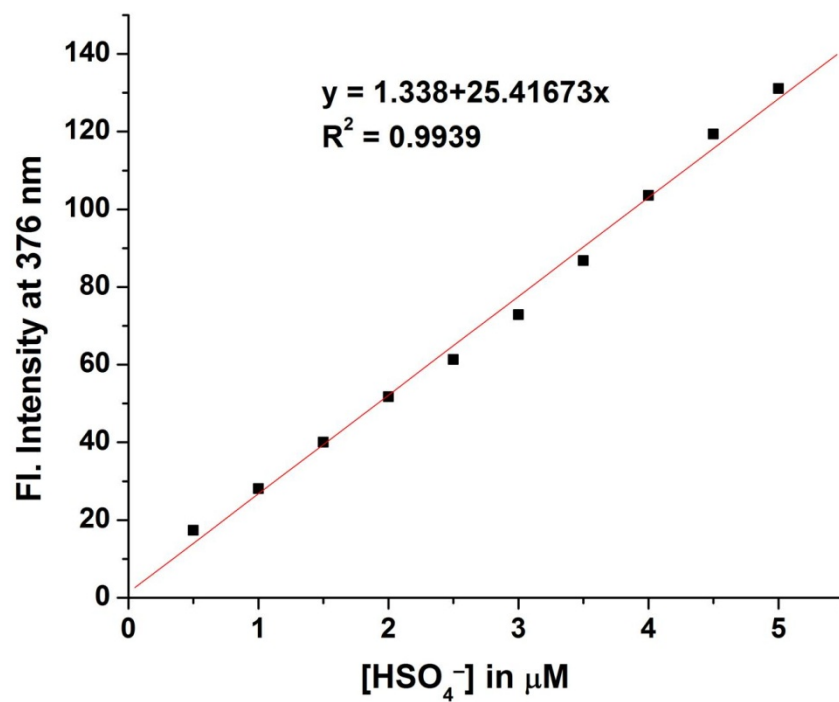

Fig. S12. Linear response curve of HL at 376 nm depending on the  $\text{HSO}_4^-$  concentration.

(From the graph we get slope = 25.41673, and  $Sb_1$  value is  $5.0859 \times 10^{-4}$ . Thus using the formula we get the LOD =  $0.274 \times 10^{-6}$  M)

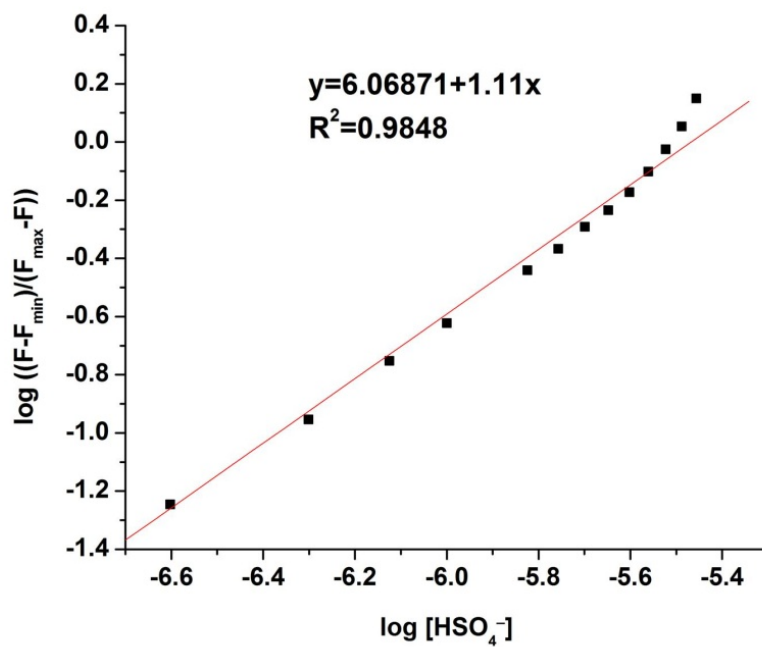

Fig. S13. Determination of binding constant of HL for  $\text{HSO}_4^-$  from fluorescent titration data

(For determination of binding constant of  $\text{HSO}_4^-$  with the chemosensor,  $\beta$  is found to be  $1.17 \times 10^6$  and  $n = 1.11$  indicating 1:1 stoichiometry for the formed HL- $\text{HSO}_4^-$  complex)

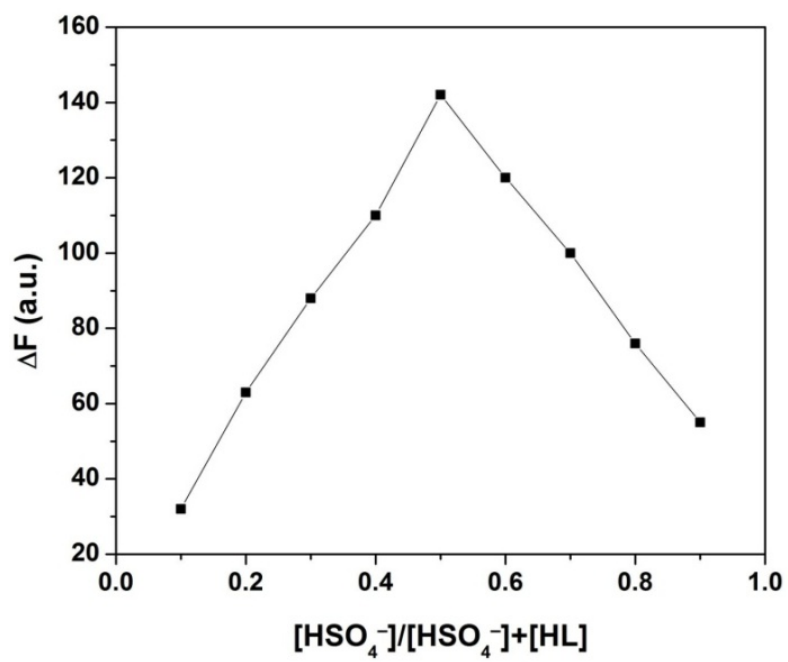

Fig. S14. Job's plot diagram of receptor for  $\text{HSO}_4^-$  (where  $\Delta F$  indicates the change of emission intensity at 376 nm).

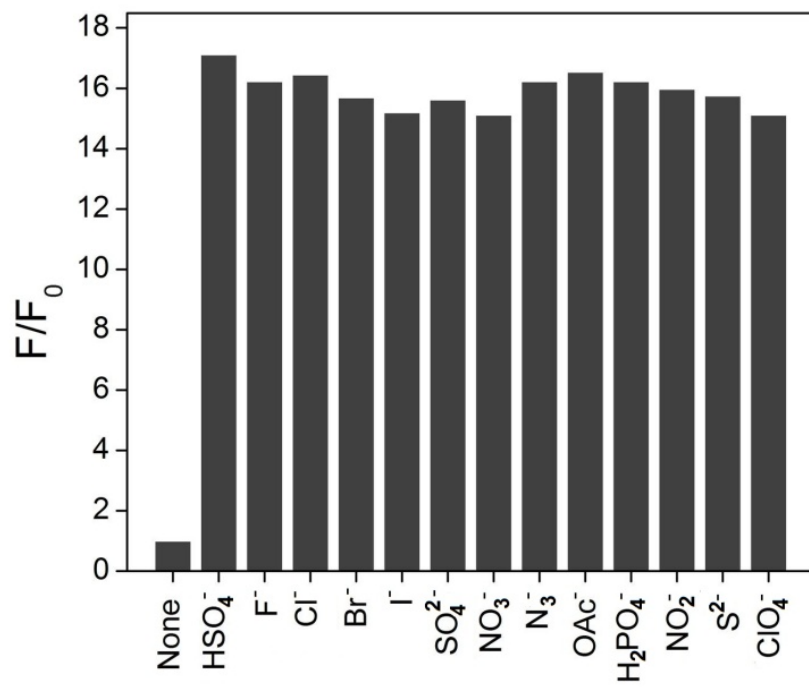



Fig. S15. Change in emission intensity upon addition of 1 equivalents of  $\text{HSO}_4^-$  along with 2 equivalents of other anions to the receptor HL

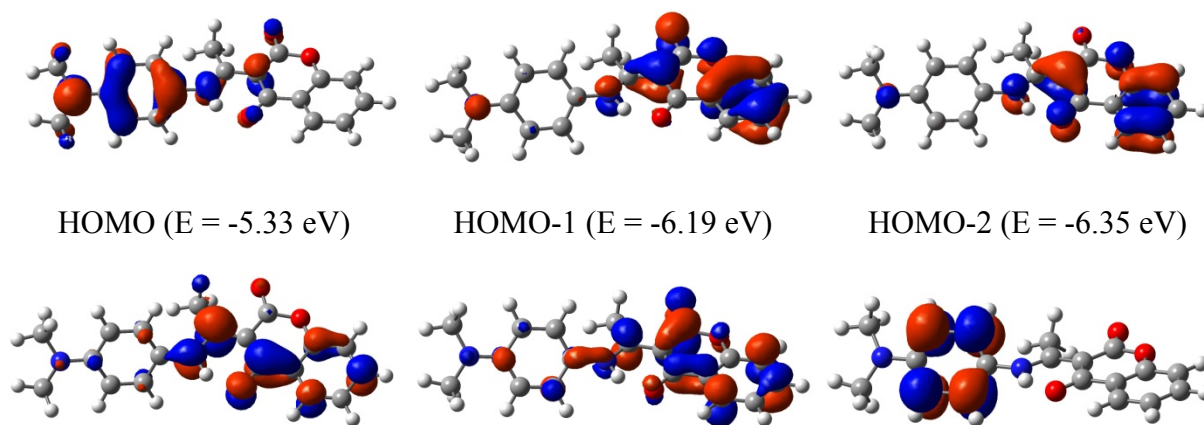

LUMO (E = -1.58 eV)

LUMO+1 (E = -0.46 eV)

LUMO+2 (E = -0.30 eV)

Fig. S16. Contour plots of selected molecular orbitals of chemosensor (HL)

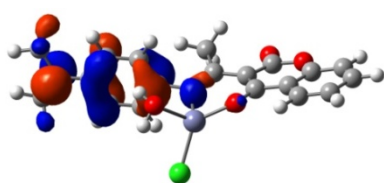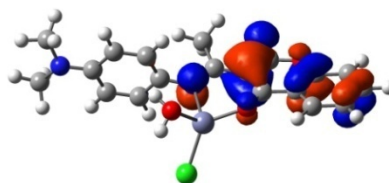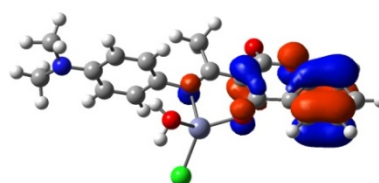

HOMO (E = -5.58 eV)

HOMO-1 (E = -6.16 eV)

HOMO-2 (E = -6.52 eV)

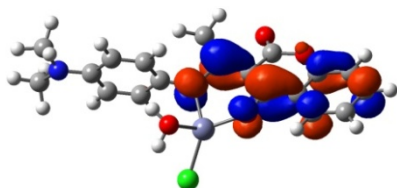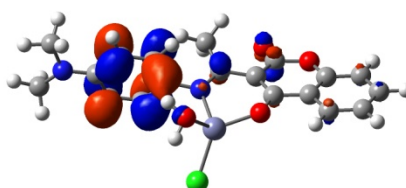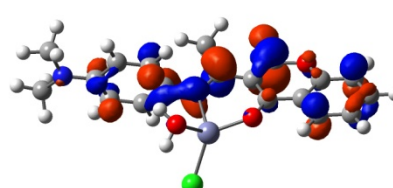

LUMO (E = -1.75 eV)

LUMO+1 (E = -0.76 eV)

LUMO+2 (E = -0.48 eV)

Fig. S17. Contour plots of selected molecular orbitals of HL-Zn<sup>2+</sup>

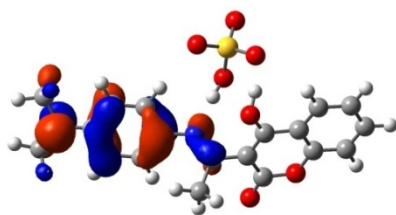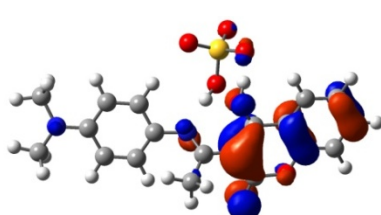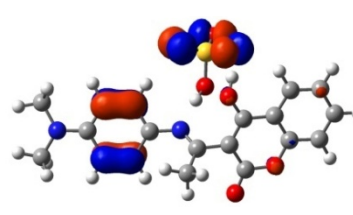

HOMO (E = -5.03 eV)

HOMO-1 (E = -6.33 eV)

HOMO-2 (E = -6.77 eV)

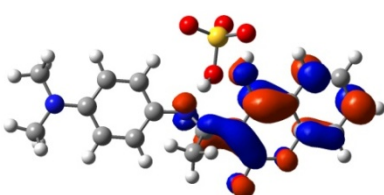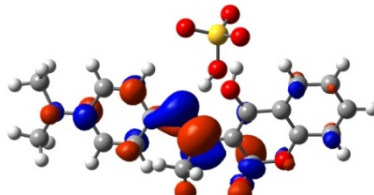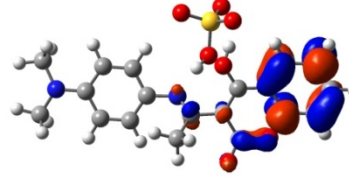

LUMO (E = -1.72 eV)

LUMO+1 (E = -0.81 eV)

LUMO+2 (E = -0.24 eV)

Fig. S18. Contour plots of selected molecular orbitals of HL-HSO<sub>4</sub><sup>-</sup>
